# Supplementary material
Source: publisher figshare collection journal article supplement (https://acs.figshare.com/ndownloader/files/4152013)
Supplement: Supplementary file 1 [file 4152013]

Supporting information for:

# Mechanistic Insights into the Crystallization of Amorphous Calcium Carbonate (ACC)

Table S1 Summary of experimental conditions. SI is saturation index with respect to vaterite.

| Experiment             | CaCl <sub>2</sub> solutions |                | Na <sub>2</sub> CO <sub>3</sub> /Na <sub>2</sub> SO <sub>4</sub> solutions |                        |                | Solutions after mixing and prior to precipitation |                        |                        |                |     |
|------------------------|-----------------------------|----------------|----------------------------------------------------------------------------|------------------------|----------------|---------------------------------------------------|------------------------|------------------------|----------------|-----|
|                        | Ca<br>(M)                   | Volume<br>(ml) | CO <sub>3</sub><br>(M)                                                     | SO <sub>4</sub><br>(M) | Volume<br>(ml) | Ca<br>(M)                                         | CO <sub>3</sub><br>(M) | SO <sub>4</sub><br>(M) | Volume<br>(ml) | SI  |
| Pure ACC               | 1                           | 100            | 1                                                                          | -                      | 100            | 0.5                                               | 0.5                    | -                      | 200            | 4.2 |
| SO <sub>4</sub> (repl) | 1                           | 100            | 0.9                                                                        | 0.1                    | 100            | 0.5                                               | 0.45                   | 0.05                   | 200            | 4.2 |
| SO <sub>4</sub> (add)  | 2.5                         | 40             | 0.625                                                                      | 0.0625                 | 160            | 0.5                                               | 0.5                    | 0.05                   | 200            | 4.2 |

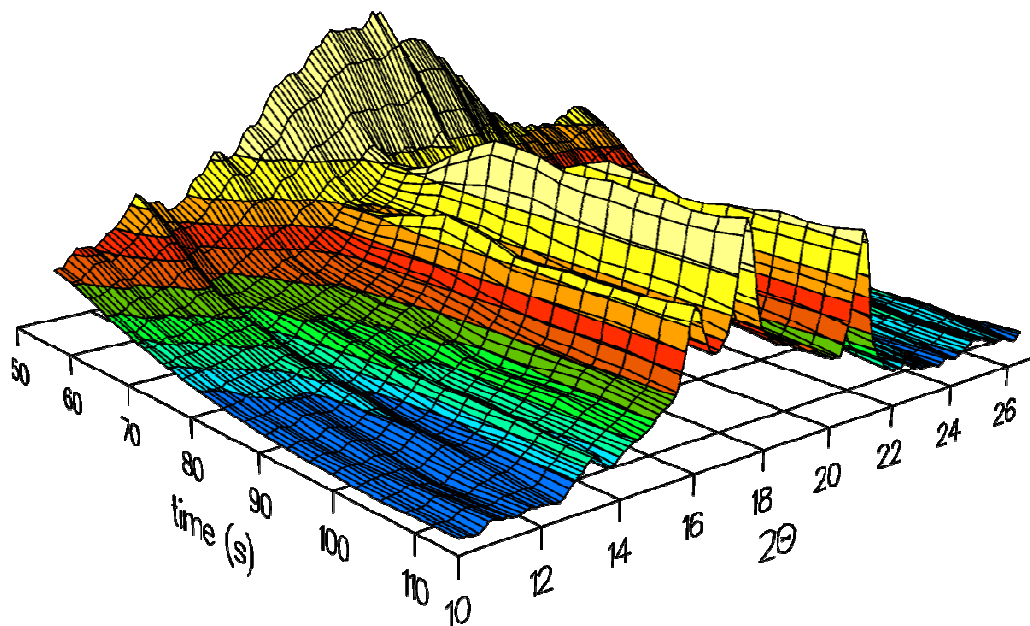

Figure S1 3D representations of the time resolved WAXS patterns from first 2 minutes of the pure ACC experiment.

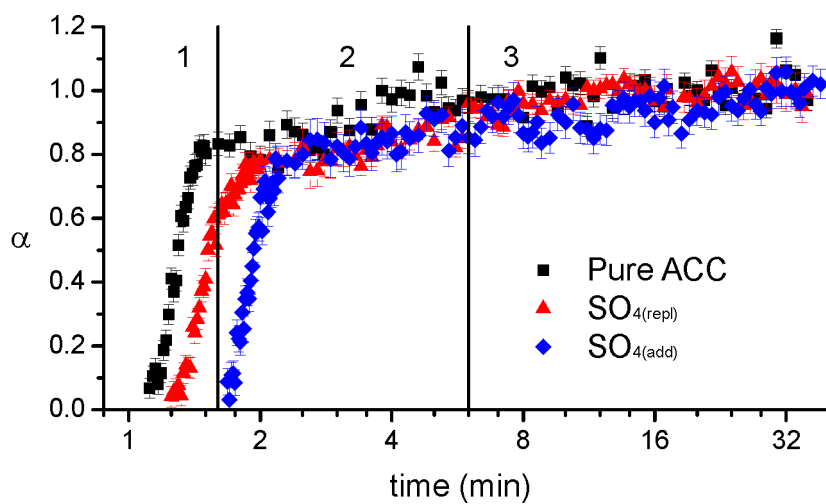

Figure S2  $\alpha_{\text{vaterite}}$  plots for the pure ACC,  $\text{SO}_{4(\text{add})}$  and  $\text{SO}_{4(\text{repl})}$  experiment; time is plotted on a base 2 log scale.

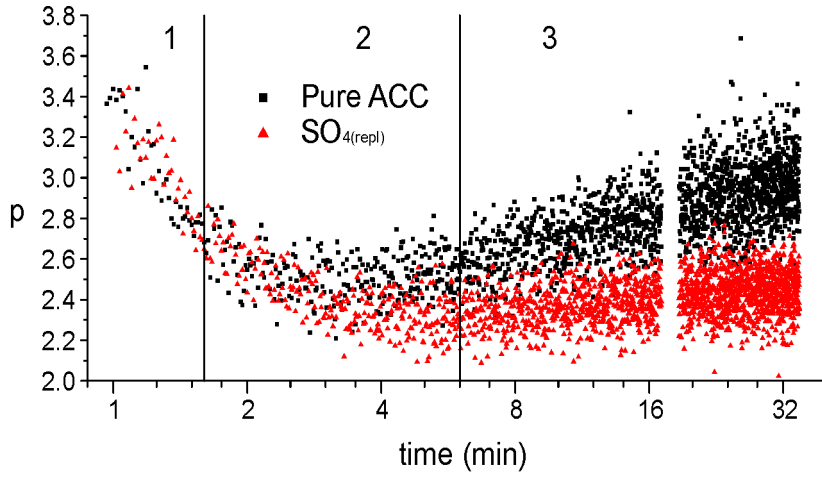

Figure S3 The slope of the Porod region ( $I(q) \propto q^{-p}$ ) calculated from the SAXS patterns for the pure ACC and  $\text{SO}_{4(\text{repl})}$  experiments as a function of time (on a base 2 log scale)

The value of the slope ( $p$ ) of the Porod region (high  $q$  values in SAXS data; Figure S3) can give information on the fractal dimensions of scattering particles and surfaces.<sup>1-3</sup> Figure S3 shows that in the first ~4 minutes of the experiments, the Porod slope ( $p$ ) decreased from ~3.4 to ~2.5. In the pure ACC experiment,  $p$  increased subsequently to ~2.9 during stage three, while in the  $\text{SO}_{4(\text{repl})}$  experiment,  $p$  remained ~2.5.

If:  $1 < p < 3$ , the scattering particles are volume fractals with a mass fractal dimension:

$$D_m = p \quad (\text{Eq. S1});^4$$

If:  $3 < p < 4$ , the scattering particles have fractal surfaces with a surface fractal dimension of:

$$D_s = 6 - p \quad (\text{Eq. S2}).^5$$

Initially when the only phase was ACC (Figure 2A),  $p$  had a value of ~3.4 (Figure S3). This indicates that the ACC particles had rough surfaces, with a surface fractal dimension ( $D_s$ ) of 2.6 (Eq. S1)<sup>4</sup>. The decrease in  $p$  during the first 4 minutes of the experiments coincides with the decrease in  $\alpha_{\text{ACC}}$  (Figure 2A). When all ACC was transformed to vaterite,  $p$  reached its lowest value of ~2.5. This indicates the vaterite spherulites have a

mass fractal character ( $D_m \approx 2.5$  (Eq. S2))<sup>5</sup>, which has been shown previously for polycrystalline/porous aggregates.<sup>6</sup> The decrease in  $p$  during stage two can be attributed to the transformation of the remnant ACC in suspension to vaterite (Figure 2A and 3B). The increase in  $p$  during stage three in the pure ACC system (Figure S3), indicates that the fractal appearance of the vaterite spherulites decreases (i.e.  $D_m$  increased from  $\sim 2.5$  to  $2.9$  (Eq. S2))<sup>5</sup>. Pipich et al.<sup>6</sup> have determined previously, that this correlates well with an increase in the crystallite size. During stage three in the  $\text{SO}_{4(\text{repl})}$  system,  $p$  remained at  $\sim 2.5$  (Figure S3).<sup>5</sup> This indicates that the fractal appearance of the vaterite spherulites did not change significantly.

Table S2 Summary of the PHREEQC<sup>7</sup> modeling results. The measured pH, total calcium and total sulfate concentrations were used as input parameters to calculate the total inorganic carbonate (TIC), the aqueous carbonate speciation and the *SI* with respect to vaterite.

| <b>Pure ACC</b>             |     | Total concentrations (mM) |     |                 | Aqueous speciation (mM) |                               |                               |                               | SI (vaterite) |
|-----------------------------|-----|---------------------------|-----|-----------------|-------------------------|-------------------------------|-------------------------------|-------------------------------|---------------|
| time (min)                  | pH  | Ca                        | TIC | SO <sub>4</sub> | Ca <sup>2+</sup>        | CO <sub>3</sub> <sup>2-</sup> | HCO <sub>3</sub> <sup>-</sup> | SO <sub>4</sub> <sup>2-</sup> |               |
| 1                           | 9.5 | 26                        | 30  | 0               | 20                      | 4.0                           | 7.3                           | 0                             | 2.3           |
| 2                           | 8.5 | 11                        | 18  | 0               | 9.9                     | 0.71                          | 12                            | 0                             | 1.2           |
| 5                           | 8.2 | 9.2                       | 17  | 0               | 8.7                     | 0.36                          | 12                            | 0                             | 0.89          |
| 8                           | 8.2 | 8.9                       | 16  | 0               | 8.4                     | 0.35                          | 12                            | 0                             | 0.86          |
| 10                          | 8.2 | 9.0                       | 16  | 0               | 8.5                     | 0.35                          | 12                            | 0                             | 0.87          |
| 20                          | 8.2 | 8.7                       | 16  | 0               | 8.2                     | 0.34                          | 12                            | 0                             | 0.84          |
| 30                          | 8.2 | 8.5                       | 16  | 0               | 8.0                     | 0.32                          | 11                            | 0                             | 0.81          |
| <b>SO<sub>4</sub>(repl)</b> |     | Total concentrations (mM) |     |                 | Aqueous speciation (mM) |                               |                               |                               | SI (vaterite) |
| time (min)                  | pH  | Ca                        | TIC | SO <sub>4</sub> | Ca <sup>2+</sup>        | CO <sub>3</sub> <sup>2-</sup> | HCO <sub>3</sub> <sup>-</sup> | SO <sub>4</sub> <sup>2-</sup> |               |
| 1                           | 8.8 | 75                        | 45  | 45              | 57                      | 2.1                           | 22                            | 23                            | 2.5           |
| 2                           | 8.1 | 53                        | 32  | 36              | 44                      | 0.48                          | 22                            | 19                            | 1.7           |
| 5                           | 8.0 | 49                        | 28  | 34              | 42                      | 0.31                          | 20                            | 18                            | 1.5           |
| 8                           | 7.9 | 48                        | 27  | 34              | 41                      | 0.28                          | 19                            | 18                            | 1.5           |
| 10                          | 7.9 | 49                        | 28  | 34              | 42                      | 0.28                          | 19                            | 18                            | 1.5           |
| 20                          | 7.9 | 49                        | 26  | 36              | 42                      | 0.26                          | 18                            | 19                            | 1.4           |
| 30                          | 7.9 | 50                        | 27  | 36              | 42                      | 0.27                          | 19                            | 19                            | 1.4           |
| <b>SO<sub>4</sub>(add)</b>  |     | Total concentrations (mM) |     |                 | Aqueous speciation (mM) |                               |                               |                               | SI (vaterite) |
| time (min)                  | pH  | Ca                        | TIC | SO <sub>4</sub> | Ca <sup>2+</sup>        | CO <sub>3</sub> <sup>2-</sup> | HCO <sub>3</sub> <sup>-</sup> | SO <sub>4</sub> <sup>2-</sup> |               |
| 1                           | 9.6 | 32                        | 39  | 48              | 22                      | 5.4                           | 8.5                           | 27                            | 2.5           |
| 2                           | 8.9 | 11                        | 35  | 38              | 8.5                     | 2.4                           | 19                            | 22                            | 1.7           |
| 5                           | 8.7 | 11                        | 37  | 38              | 8.3                     | 1.8                           | 23                            | 22                            | 1.6           |
| 8                           | 8.7 | 11                        | 36  | 38              | 8.1                     | 1.7                           | 22                            | 22                            | 1.5           |
| 10                          | 8.7 | 10                        | 35  | 39              | 8.1                     | 1.7                           | 22                            | 22                            | 1.5           |
| 20                          | 8.6 | 10                        | 34  | 39              | 8.1                     | 1.6                           | 22                            | 23                            | 1.5           |
| 30                          | 8.6 | 10                        | 33  | 40              | 8.1                     | 1.5                           | 21                            | 23                            | 1.5           |

Table S3 The rate constants ( $k$ ) and induction time ( $t_0$ ) derived from the  $\alpha_{\text{vaterite}}$  data fitted with the JMAK model<sup>8-11</sup>.

| JMAK Equation: $\alpha(t) = 1 - \exp [k(t - t_0)^4]$ |                          |       |       |
|------------------------------------------------------|--------------------------|-------|-------|
| Experiment                                           | Variable                 | Value | Error |
| Pure ACC                                             | $k$ (min <sup>-4</sup> ) | 48.7  | 8.8   |
| Adj. $R^2 = 0.9888$                                  | $t_0$ (min)              | 0.93  | 0.02  |
| SO <sub>4(repl)</sub>                                | $k$ (min <sup>-4</sup> ) | 11.7  | 2.5   |
| Adj. $R^2 = 0.9828$                                  | $t_0$ (min)              | 0.98  | 0.03  |
| SO <sub>4(add)</sub>                                 | $k$ (min <sup>-4</sup> ) | 9.2   | 2.3   |
| Adj. $R^2 = 0.9727$                                  | $t_0$ (min)              | 1.37  | 0.03  |

## References

1. Tobler, D. J.; Shaw, S.; Benning, L. G., Quantification of initial steps of nucleation and growth of silica nanoparticles: An in-situ SAXS and DLS study. *Geochimica et Cosmochimica Acta* **2009**, 73, (18), 5377-5393.
2. Benning, L. G.; Waychunas, G. A., Nucleation, Growth, and Aggregation of Mineral Phases: Mechanisms and Kinetic Controls. In *Kinetics of Water-Rock Interactions*, Brantley, S.; Kubicki, J.; White, A., Eds. Springer-Verlag: New-York, 2007; pp 259-333.
3. Schmidt, P. W., Small-Angle Scattering Studies of Disordered, Porous and Fractal Systems. *Journal of Applied Crystallography* **1991**, 24, 414-435.
4. Teixeira, J., Small-Angle Scattering by Fractal Systems. *Journal of Applied Crystallography* **1988**, 21, 781-785.
5. Bale, H. D.; Schmidt, P. W., Small-Angle X-Ray-Scattering Investigation of Submicroscopic Porosity with Fractal Properties. *Physical Review Letters* **1984**, 53, (6), 596.
6. Pipich, V.; Balz, M.; Wolf, S. E.; Tremel, W.; Schwahn, D., Nucleation and Growth of CaCO<sub>3</sub> Mediated by the Egg-White Protein Ovalbumin: A Time-Resolved in situ Study Using Small-Angle Neutron Scattering. *Journal of the American Chemical Society* **2008**, 130, (21), 6879-6892.
7. Parkhurst, D. L.; Appelo, C. A. J., *User's guide to PHREEQC (version 2) — a computer program for speciation, batch-reaction, one-dimensional transport, and inverse geochemical calculations*. U.S. Geological Survey Denver, Colorado, 1999; p 312.
8. Avrami, M., Kinetics of phase change, I. General Theory. *Journal of Chemical Physics* **1939**, 7, 1103-1112.
9. Avrami, M., Kinetics of phase change, II. Transformation-Time Relations for Random Distribution of Nuclei. *Journal of Chemical Physics* **1940**, 8, 212-224.
10. Avrami, M., Kinetics of Phase Change, III. Granulation, Phase Change, and Microstructure. *Journal of Chemical Physics* **1941**, 9, 177-184.
11. Johnson, W. A.; Mehl, R. F., Reaction kinetics in processes of nucleation and growth.

*Transactions of the American Institute of Mining, Metallurgical and Petroleum Engineers* **1939**, 135, 416-442.
